# Supplementary material
Source: HighWire-hosted journal article supplement (https://www.annfammed.org/highwire/filestream/8853/field_highwire_adjunct_files/0/Ho_Supp.pdf)
Supplement: Ho_Supp.pdf [file Ho_Supp.pdf]

## Supplemental materials for

Ho L, Antonucci J. Using patient-entered data to supercharge self-management. *Ann Fam Med*. 2017;15(4):382.

Lynn Ho, MD<sup>1</sup>

Jean Antonucci, MD<sup>2</sup>

<sup>1</sup> North Kingstown Family Practice, North Kingstown, Rhode Island

<sup>2</sup> Jean Antonucci, MD, Farmington, Maine

## References

1. Nunlist MM, Blumberg J, Uiterwyk S, et al. Using health confidence to improve patient outcomes. *Fam Pract Manag*. (2016 Nov/Dec) 23:21-24.
2. Wasson JH. A Patient-Reported Spectrum of Adverse Health Care Experiences: Harms, Unnecessary Care, Medication Illness, and Low Health Confidence. (2013) *J Ambulatory Care Manage*: Vol. 36, No. 3, pp. 245–250.
3. Greene, J, and Hibbard, J, Why Does Patient Activation Matter? An Examination of the Relationships Between Patient Activation and Health Related Outcomes. *J Gen Intern Med* (2012) 27(5):520-6.

General references re: confidence.

Lynn Ho, MD; John Watt Haresch, MD; Mark Nunlist, MD; Adam Schwarz, MD; John H. Wasson, MD. Improvement of Patients' Health Confidence: A Comparison of 15 Primary Care Practices and a National Sample. 2013. *J Ambulatory Care Manage*. Vol. 36, No. 3, pp. 235–240

Wasson JH and Coleman EA. Health Confidence: A simple, essential measure for patient engagement and better practice. *Family Practice Management* Sept.-Oct 2014. Pages 8-12.

Clinical vignette re: health confidence, published RIAFP Winter 2016 journal:  
<https://dl.dropboxusercontent.com/u/8789614/Patient%20Confidence%20-%20published%20RI%20AFP%20Winter%202016.docx>

## Appendix 1. How's Your Health?

Link to the online tool: [www.howsyourhealth.org](http://www.howsyourhealth.org)

Survey questions and scoring conventions: [https://howyourhealth.org/html/adult\\_survey.pdf](https://howyourhealth.org/html/adult_survey.pdf)

How to set up and use the tool: <https://howyourhealth.org/usinghyhpracticeprovider.pdf>

How two practices explain and use confidence:

<https://www.yourmedicalhome.com/confidencematters.php>

<http://www.drlynnho.net/practice-quality.html>

## Appendix 2. Snapshot of patient-entered practice quality data aggregated by the online tool.

|                                                      | All Records | Women  | Men     | Income Problems |                     |
|------------------------------------------------------|-------------|--------|---------|-----------------|---------------------|
| Care Quality Summary                                 | 539         | 376    | 163     | 56              |                     |
| % Taking 3 or more medications                       | 28.01       | 32.98  | 16.56   | 48.21           |                     |
| % unable to participate fully in daily work- 2 weeks | 20.00       | 15.38  | 31.25   | 25.00           |                     |
| % With Sick Days in 3 Months                         | 14.95       | 16.04  | 12.42   | 25.00           |                     |
| % Hospitalized or ED for Chronic Disease (H)         | 5.18        | 6.30   | 3.03    | 7.14            |                     |
| % Hospitalized for Any Reason in Past Year (H)       | 6.78        | 9.41   | 0.63    | 14.29           |                     |
| % Necessary of One Hosp/ED                           | 91.30       | 90.48  | Too Few | Too Few         |                     |
| % Necessary of Multi Hosp/ED                         | 100.00      | 100.00 | Too Few | Too Few         |                     |
| % Having a PCP (Bii)                                 | 95.27       | 94.58  | 96.86   | 94.55           | Continuity          |
| % Having 2 or more Drs                               | 33.21       | 37.47  | 23.27   | 42.59           |                     |
| % One in charge (Biv)                                | 96.53       | 96.35  | 97.22   | 100.00          | Coordination        |
| % Having Specialist Perfect Care                     | 85.00       | 87.50  | Too Few | Too Few         |                     |
| % Having Overall Perfect Care                        | 91.07       | 90.88  | 91.50   | 76.47           |                     |
| % Having Very Easy Access (Bi)                       | 85.74       | 86.45  | 84.08   | 71.15           | Access              |
| % Having Confidence in self-management (D)           | 69.94       | 69.92  | 70.00   | 47.27           | Confidence          |
| % Seldom Wasted Time (Bii)                           | 97.88       | 97.80  | 98.06   | 96.23           | Efficiency          |
| % Get Exact Care Needed (A)                          | 82.05       | 83.24  | 79.22   | 61.54           | Overarching quality |

Example: Using patient entered data to improve “information quality” in a practice’s hypertensive population - Wasson JH, Anders GS, Moore LG, Ho L, Nelson EC, Godfrey MM, Batalden PB. Clinical Microsystems, Part 2. Learning from Micro Practices about Providing Patients the Care They Want and Need. Joint Commission Journal of Quality and Patient Safety 2008;34: sidebar, page 450.

### General References re: Care Quality

Guinn N and Moore LG. Practice Measurement: A New Way to Show the Worth of Your Work. Family Practice Management. 2008; February: 19-22.

Wasson, JH. A Troubled Asset Relief Program for the Patient-Centered Medical Home. Journal of Ambulatory Care Management. 40(2):89-100, April/June 2017.

| QUALITY TOOL    | Cost, Hours/yr | Cost, Dollars/yr | Practice Utility |
|-----------------|----------------|------------------|------------------|
| Confidence Tool | 104            | 0                | +++++            |
| NCQA's PCMH     | 800+ (initial) | 15K (initial)    | +                |
| MU              | 27             | EHR cost         | 0                |
| HEDIS           | 52             | 2K               | 0                |
| PQRS            | 52             | .5K              | 0                |
| State HIE       | 30 (initial)   | 0                | +++++            |
